# Supplementary material for: Clinical Outcome And Associated Factors Among Patients Admittedto The Intensive Care Unit Of Jigjiga University Sheik Hassen Yabare Referral Hospital, Somali Region, Ethiopia, 2020
Source: Research Square preprint supplement (doi:10.21203/rs.3.rs-8419546/v1), 2026-01-06
Supplement: Supplementary file 1 [file fddcd7c355f2e9520289a38a.docx]

# ANNEX’S

## ANNEX 1: ENGLISH VERSION INFORMATION

**Title of the Project**
Clinical Outcomes and Associated Factors among Patients Admitted to the Intensive Care Unit of Jigjiga University Sheik Hassen Yabare Referral Hospital, Somali Region, Ethiopia, 2020.

**Purpose of the Study**
The purpose of this study is to assess the clinical outcomes and associated factors among patients admitted to the Intensive Care Unit (ICU) of Jigjiga University Sheik Hassen Yabare Referral Hospital. The findings are expected to help health professionals, hospital administrators, and policy makers improve the quality of critical care services and patient outcomes in the ICU.

**Procedures and Duration**
If you agree to participate, relevant information will be collected from your medical records and, when appropriate, through a brief interview with you or your legally authorized caregiver/attendant. No additional medical procedures will be performed for this study. The interview, if conducted, will take approximately 15–20 minutes.

**Risks and Benefits**
Participation in this study involves minimal risk. There will be no physical harm, and your routine medical care will not be affected. The only inconvenience may be the time required for the interview. There is no direct benefit to you; however, the results of this study may help improve ICU care and patient management in the future.

**Confidentiality**
All information you provide will be kept strictly confidential. No personal identifiers will be collected, and your name will not appear on the questionnaire or in any report. The data will be coded, and the findings will be reported in aggregate form only. No oral or written reports will include information that could identify you as an individual participant.

**Rights of the Participant**
Participation in this study is entirely voluntary. You have the right to choose whether or not to participate. If you decide to participate, you may withdraw from the study at any time without any penalty or loss of benefits to which you are otherwise entitled. You are also free to skip any question you do not wish to answer.

## ANNEX’S 2: ENGLISH VERSION QUESTIONNAIRE

## 7.6: DATA Collection tool (English version)

**Section 1: - Socio-demographic characteristics**

**Questions format**

S.no_________

File no. ___________

| s.no | Question | Response |
| --- | --- | --- |
|  | Age | 1. 0-9year 2. 10-19year 3. 20-29year4. 30-39year 5. 40-49year 6. 50-59year7. 60-69year 8. >70 |
|  | Sex | 1. Male 2. Female |
| 3. | Duration of stay in ICU in day’s/hour? | 1.6-10 hours 2. 11-23hours 3. 1-5 days 4. 6-10days 5. 11-15days 6. 16-20 days 7. 21-25 days 8. > 26days |
| 4 | What was the pattern of admission? | 1. In patient (within the hospital) 2. Other hospital |
| 5. | Under which department, was the patient admitted? | 1. Surgery 2. Internal medicine 3. Gyn/Obstetric 4. Pediatrics 5. Emergency department |
| 6 | Cause of admission(diagnosis) to ICU |  |
| 7. | What Comorbidities does the pt. have­­ | 1. No 1. HTN 2. DM 3. COPD 4 Asthma 5. Malignancy 6. OTHERS |
| 8. | Does the patient require mechanical ventilation? | 0. No 1. Yes |
| 9 | Does the pt. use major Antibiotics? | 1. 0. No 1. Yes |
| 10 | Does the pt. need/ uses Ulcer prophylaxis? | 1. 0. No 1. Yes |
| 11. | Does the pt. uses DVT prophylaxis? | 1. 0. No 1. Yes |
| 12. | Does the pt. need/ usesAnti-pain/analgesics? | 1. 0. No 1. Yes |
| 13 | Others (please specify) (inotropes) | 1. 0.No1. Yes |
| 14 | What was the outcome of the patient during discharge? | 1. 1. Transferred to ward 2. Discharged home/ self -discharge3. Died 4. Referred 5. Not known. |
| 15 | If dead, what is the possible cause of death? | 1. 1. MOF 2. MI 3. Brainherniation/death 4. Others |
